# Supplementary material
Source: publisher figshare collection journal article supplement (https://acs.figshare.com/ndownloader/files/6329232)
Supplement: Supplementary file 1 [file 6329232]

## Supporting Information

Manuscript title: CO<sub>2</sub> sorption enhancement of extruded-spheronized CaO-based pellets by sacrificial biomass templating technique

Authors: Jian Sun, Wenqiang Liu\*, Wenyu Wang, Yingchao Hu, Xinwei Yang, Hongqiang Chen, Yang Peng and Minghou Xu\*

*State Key Laboratory of Coal Combustion, School of Energy and Power Engineering, Huazhong University of Science and Technology, Wuhan 430074, China*

*\*Corresponding Author*

\*Phone: 86-27-87544779-8301; fax: 86-27-87545526; e-mail:

[wenqiang.liu@hust.edu.cn](mailto:wenqiang.liu@hust.edu.cn).

\*Phone: 86-27-87544779-8309; fax: 86-27-87545526; e-mail: [mh xu@hust.edu.cn](mailto:mh xu@hust.edu.cn).

Number of papers: 4

Number of Figures: 2

**Preparation of biomass-templated pellets.**

The biomass-templated pellets were prepared via an extrusion-spheronization method, as shown in Fig. S1. The detailed preparation process is as follows: first, weighted amounts of calcium hydroxide reagent and biomass template materials were vigorously blended to obtain the homogeneous mixtures; simultaneously moderate amount of deionized water was sprayed to wet the mixtures. Then, the wet mixtures were extruded to obtain columned extrudates using a mini extruder (E25, Xinyite Technology Co., Ltd., China) with a 1 mm die. During the extrusion process, the rotational speed of the mini extruder was maintained at 90 rpm. Finally, the columned extrudates were spheronized in a spheronizer (Mini S, Xinyite Technology Co., Ltd., China) at a rotational speed of 1000 rpm for 5 min. The biomass-templated pellets with particle size fraction of 0.9-1.25 mm were collected and air dried for overnight prior to being used for the CO<sub>2</sub> uptake test.

**Figure captions:**

**Fig. S1.** The preparation process of biomass-templated pellets.

**Fig. S2.** Schematic for the identification of three carbonation stages of sorbent pellets.

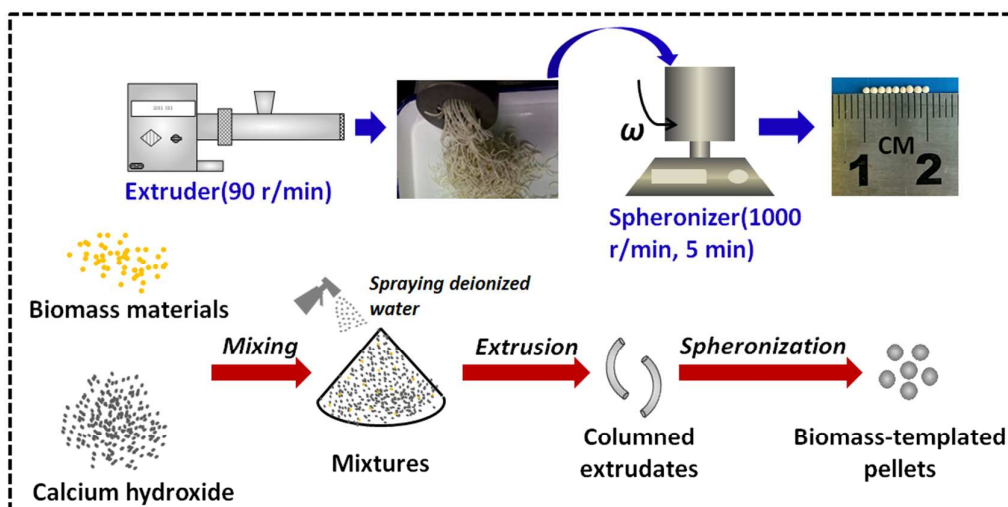

Fig. S1.

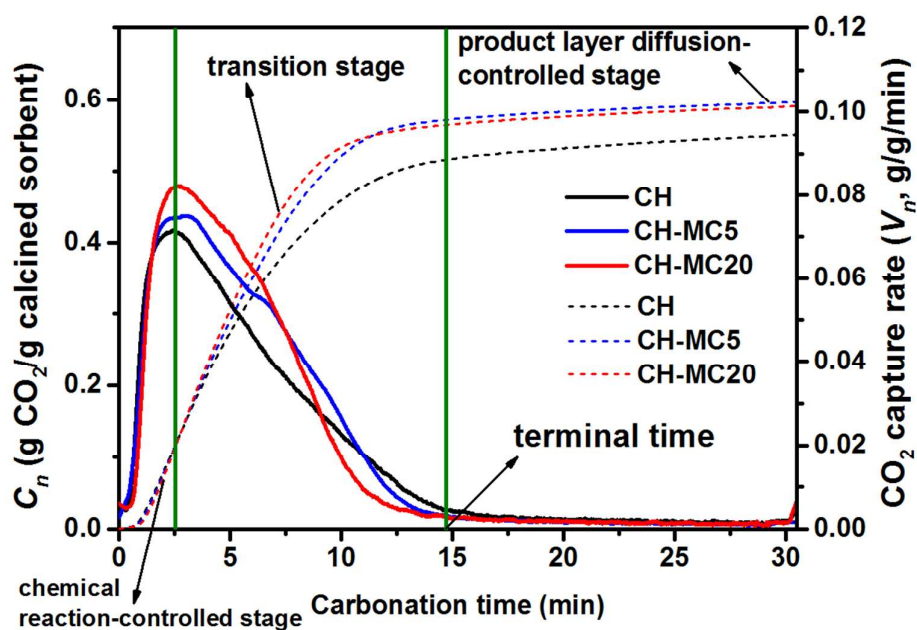

Fig. S2.
